# Supplementary material for: BEATBOX: Background Error Analysis Testbed with Box Models
Source: Copernicus journal article supplement (doi:10.5194/gmd-2017-188), 2017-10-04

## Correction of our response to reviewer #2

### Anonymous Referee #2

Received and published: 21 November 2017

[...]

Figure 9: These are difficult to compare with the different y axis. Consider an additional plot that contains net production and net loss for each run, and including these all on the same axis (without individual reactions).

Unfortunately, when made a mistake when submitting our replies to reviewer 2 and included an erroneous revised version of Figure 9. Please find the correct new version of Figure 9 here below:

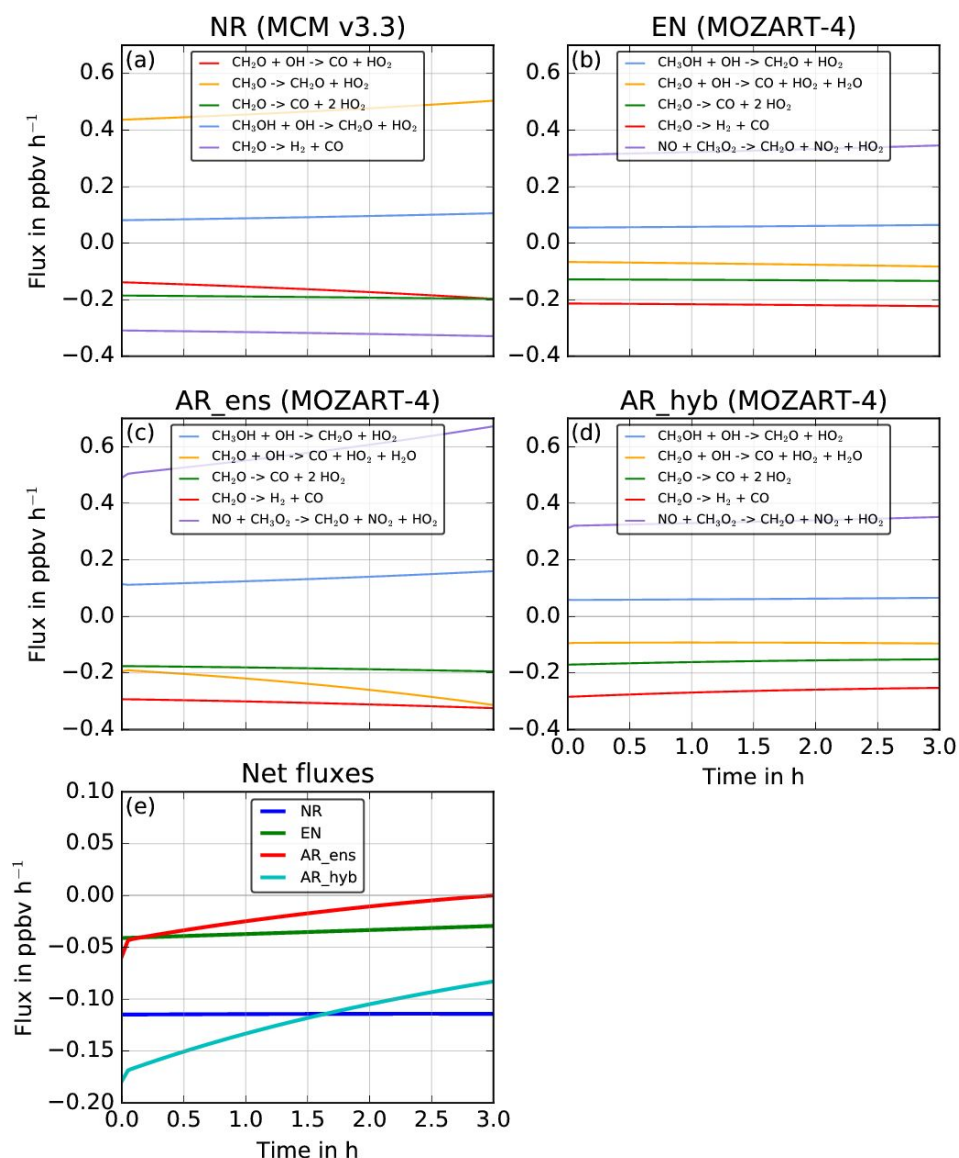

Supplement: Supplementary file [file gmd-2017-188-AC5-supplement.pdf]
